# Supplementary material for: C-Lobe of Lactoferrin: The Whole Story of the Half-Molecule
Source: PubMed Central journal article supplement (PMC3671519; doi:10.1155/2013/271641), 2013-05-15
Supplement: 271641.f1.pdf [file 271641.f1.pdf]

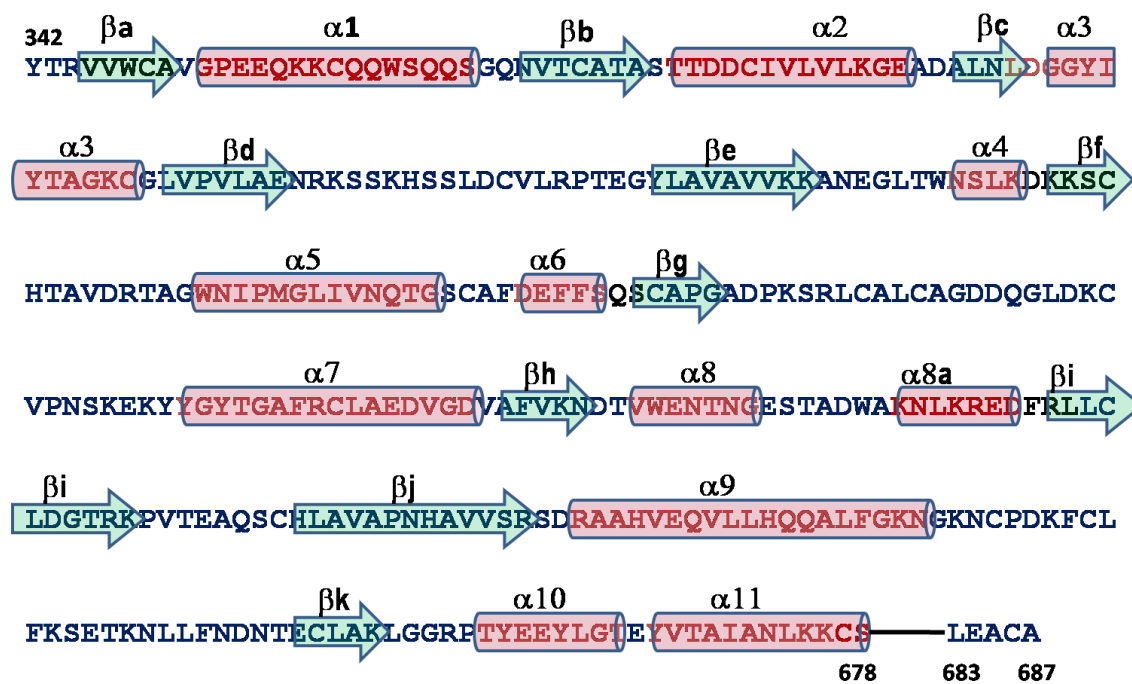

Fig. S1
