# Supplementary material for: C-Lobe of Lactoferrin: The Whole Story of the Half-Molecule
Source: PubMed Central journal article supplement (PMC3671519; doi:10.1155/2013/271641), 2013-05-15
Supplement: 271641.f2.pdf [file 271641.f2.pdf]

N-lobe 1 APRKNVRWCTISQPEWFKRRWQWRMKKLGAPSI TCVRRAFALECI RAI A EKKADAVTLD 60  
 C-lobe 342 --YTRVVWCAVGPEEQKKCQQWSQ----QSGQNVTCATASTTDDCIVLVLKGEADALNLD 395

N-lobe 61 GGMVFEAGRDPYKLRPVAAE IYGTKE S-----PQTHYYAVAVVKKGSN-FQLDQLQG 111  
 C-lobe 396 GGYIYTAG--KCGLVPVLAENRKS SKHSSLDCVLRPTEGYLAVAVVKKANEGLTWNLSLKD 454

N-lobe 112 RKSCHTGLGRSAGWII PMGILRPYLSWTESLEPLQGAVAKFFSASCVP CIDRQAYPNLCQ 171  
 C-lobe 455 KKSCHTAVDRTAGWNI PMGLIVN-----QTGSCAFDEFFSQSCAPGADPKSR--LCA 503

N-lobe 172 LCKGE--GENQCACSSREPYFGYSGAFKCLQDGAGDVA FVKETTVFEN-----LPEK 221  
 C-lobe 504 LCAGDDQGLDKCVFNSKEKYGYTGAFRCLAEDVGDVAFVKNDTVWENTNGESTADWAKN 563

N-lobe 222 ADFDQYELLCLNNSRAPVDAFKECHLAQVFSHAVVARSVDGKEDLIWKLLSKAQEKFGKN 281  
 C-lobe 564 LKREDFRLLCLDGTRKPVTEAQSCHLAVAPNHAVVSRSD--RAAHVEQVLLHQQALFGKN 621

N-lobe 282 -KRSRFQLFGSPPGQRDLLFKDSALGFLRIPSKVDSALYLGSRYLTTLKNLRETAEVKA 340  
 C-lobe 622 GKNCPDKFCFLKSETKNLLENDNTECLAKLGGRPITYEYELGTEYVTAIANLKKCSTSPLL 681

Fig. S2
