# Supplementary material for: C-Lobe of Lactoferrin: The Whole Story of the Half-Molecule
Source: Hindawi journal article supplement (doi:10.1155/2013/271641), 2013-01-01
Supplement: f3 [file 271641.f3.pdf]

```

342      350      360      370      380      390      400
CC-lobe  YTRVVWCAVGPPEEQKRCQQWSQQSQQNVTCATASTTDDCVLVLKGRADAINLGGCIY
BC-lobe  RARVVWCAVGPPEEQKRCQQWSQQSQQIVTCATASTTDDCVLVLKGRADALSLOGCIY
GC-lobe  CTRVVWCAVGPPEEQKRCQQWSQQSQQNVTCATASTTDDCVLVLKGRADALSLOGCIY
UC-lobe  RAQVVWCAVGSDEQLKRCQEWSRQSNQSVVCATASTTDDCVLVLKGRADALSLOGCIY
HC-lobe  RARVVWCAVGSDEQLKRCNQWGLSEGSVTCSSASTTDDCVLVLKGRADALSLOGCIY
EC-lobe  RERVVWCAVGPPEERKRCQKQSDVSNRQVACASASTTDDCVLVLKGRADAINLGGCIY
PC-lobe  QARVVWCAVGPPEELRRCRQWSSQSSQNLNCSLASTTDDCVLVLKGRADALSLOGCIY

      410      420      430      440      450
CC-lobe  TAGKCCGLVFPVLAENRKS SKHSSLD--CVLRPTEGYLAVAVVKANEGLTWNSLKDREKSC
BC-lobe  TAGKCCGLVFPVLAENRKS SKHSSLD--CVLRPTEGYLAVAVVKANEGLTWNSLKGREKSC
GC-lobe  TAGKCCGLVFPVMAENRKS SKHSSLD--CVLRPTEGYLAVAVVKANEGLTWNSLKGREKSC
UC-lobe  IAGKCCGLVFPVLAESQQSPESGCLD--CVHRPVKGYLAVAVVKANRKITWNSLRGKREKSC
HC-lobe  TAGKCCGLVFPVLAENYKSAQSSDFDPNVCVDRPVVGYLAVAVVRSDDTLTWNSVKGREKSC
EC-lobe  VAGKCCGLVFPVLAENQKRSQNSNAPD--CVHRPPEGYLAVAVVRSDDTLTWNSLKGREKSC
PC-lobe  TAGKCCGLVFPVLAENQKRSQSSSSD--CVHRPTQGYFAVAVVKANQGITWNSVVGTKREKSC

      460      470      480      490      500      510
CC-lobe  HTAVDRTAGWNI PMGLIVNQTCSCAFDEFFFSQSCARGADFPKRLCALCAGIDQGLKRCV
BC-lobe  HTAVDRTAGWNI PMGLIANQTCSCAFDEFFFSQSCARGADFPKRLCALCAGIDQGLKRCV
GC-lobe  HTAVDRTAGWNI PMGLIANQTCSCAFDEFFFSQSCARGADFPKSLCALCAGIDQGLKRCV
UC-lobe  HTAVDRTAGWNI PMGVLFKD TDCRFDEFFFSQSCARGSDFPKRLCALCAGNEEGQLKRCV
HC-lobe  HTAVDRTAGWNI PMGLLFNQTCSCKFEDEFFFSQSCARGSDPASNLCALCIDREGENKCV
EC-lobe  HTCVRGTAAWNIPMGLLFNQTCSCKFEKFFFSQSCARGADFPKSLCALCVGNENENKCM
PC-lobe  HTAVDRTAGWNI PMGLLVNQTCSCKFEDEFFFSQSCARGSQPCSNLCALCVGDRGVKRCV

      520      530      540      550      560      570
CC-lobe  PMSKEKYGYTCAFRCLAEDVGDVAFVKNDVWENTNGESTADWAKNLRKREDFRLLCLD
BC-lobe  PMSKEKYGYTCAFRCLAEDVGDVAFVKNDVWENTNGESTADWAKNLRKREDFRLLCLD
GC-lobe  PMSKEKYGYTCAFRCLAEDVGDVAFVKNDVWENTNGESTADWAKNLRKREDFRLLCLD
UC-lobe  PMSSERLGYTCAFRCLAEDVGDVAFVKDVTVLQNTDGRKTEQWAKDLKLDQFELLCLN
HC-lobe  PMSNERYYGYTCAFRCLAENAGDVAFVKDVTVLQNTDGNNEAWAKDLKLDQFELLCLD
EC-lobe  PMSSEERYGYTCAFRCLAERKAGDVAFVKDVTVLQNTDGRNEEPWAKDLKLDQFELLCLD
PC-lobe  PMSNERYYGYTCAFRCLAENAGDVAFVKDVTVLQNTDGNTEEWAKDLKLDQFELLCLD

      580      590      600      610      620      630
CC-lobe  GTRKPVTEAQSCHLAVAPNHAVVSRSDRAAHVEQVLLHQQALFGRNGRNCDFKFCFLFS
BC-lobe  GTRKPVTEAQSCHLAVAPNHAVVSLSERAAHVEQVLLHQQALFGENGRNCDFKFCFLFS
GC-lobe  GTTKPVTEAQSCHLAVAPNHAVVSRSDRAAHVEQVLLHQQALFGRNGRNCDFKFCFLFS
UC-lobe  GTRKPVTEAESCHLVPAPNHAVVSRIDKVAHLRQVLLHQQAHFGRNGEDCPGRFCFLFS
HC-lobe  GTRKPVTEAESCHLAMAPNHAVVSRMDKVERLQVLLHQQAHFGRNGSDCFKFCFLFS
EC-lobe  GTRKPVTEAESCHLARAPNHAVVSRSDRAQHLKRVLFLQDQDFGNGDFCPGRFCFLFS
PC-lobe  GTRKPVTEAQNCHLAVAPSHAVVSRREKAAQVEQVLLTEQAGFGRVNDKDFKFCFLFS

      640      650      660      670      680
CC-lobe  ETRNLLFNQNTTECLAKLGGRTPYEEYLGTEVVTAINLKKCSTSPILLEACAPLTR
BC-lobe  ETRNLLFNQNTTECLAKLGGRTPYEEYLGTEVVTAINLKKCSTSPILLEACAPLTR
GC-lobe  ETRNLLFNQNTTECLAKLGGRTPYEYKLGTEVVTAINLKKCSTSPILLEACAPLTR
UC-lobe  KTRNLLFNQNTTECLAKLGGKTTYDENLGPQVVTAINLKRRCSTSPILLEACAPLNR
HC-lobe  ETRNLLFNQNTTECLARLHGKTTYEYKLGQVAVAGITNLKKCSTSPILLEACEPLRK
EC-lobe  ETRNLLFNQNTTECLAELGGKTTYEYKLGSEVVTITNLKRCSSTSPILLEACAPLRA
PC-lobe  ETRNLLFNQNTTECLAQLGGKTTYEYKLGSEVVTAIAT-----

```

Fig. S3
